# Supplementary material for: Synthesis of a Zn-MOF fluorescent material for sensitive detection of biothiols via an inner filter effect with MnO2 nanosheets
Source: Royal Society of Chemistry journal article supplement (doi:10.1039/d4ay01163e), 2024-01-01
Supplement: d4ay01163e1.pdf [file d4ay01163e1.pdf]

## **Synthesis of Zn-MOF fluorescent material for sensitive detection of biothiols via internal filtration effect with MnO<sub>2</sub> nanosheets**

Jianwei Lin<sup>a,#</sup>, Aizhu Lin<sup>b,#</sup>, Limin Lai<sup>a,#</sup>, Jing Chen<sup>a</sup>, Jinghua Chen<sup>a</sup> and Zhizhong  
Han<sup>a,\*</sup>

<sup>a</sup>School of Pharmacy, Fujian Medical University, Fuzhou, Fujian 350122, P R China

<sup>b</sup>Medical Research Center, Fujian Maternity and Child Health Hospital, College of  
Clinical Medicine for Obstetrics and Gynecology and Pediatrics, Fujian Medical  
University, Fuzhou 350011, Fujian, P R China

\* Corresponding author:

E-mail: zzhan@fjmu.edu.cn (Z. Han)

# These authors contributed equally to this work

## Experimental section

### Chemicals and apparatus

N, N-dimethylformamide, L-glutathione (98%), cysteine, alanine (Ala), phenylalanine (Phe), threonine (Thr) and isoleucine (Leu) were purchased from Aladdin Reagent Corporation. Zinc nitrate hexahydrate was purchased from Xilong Scientific Co., Ltd. Benzophenone 4,4' -dicarboxylic acid (H<sub>2</sub>BPDB) was purchased from Tixiai Chemical Industry Development Co., Ltd. (Shanghai, China). 4,4',4''-Nitrilotribenzoic acid (H<sub>3</sub>NTB), glycine (Gly), aspartic acid (Asp), lysine (Lys), dopamine (DA), and glutamic acid (Glu) were purchased from Shanghai Maclin Biochemistry Co., Ltd. 30% hydrogen peroxide, tetramethylammonium hydroxide, manganous nitrate, and methyl alcohol were purchased from Sinopharm Group Chemical Reagent Co., Ltd. Manganese chloride was purchased from Sheng Gong Biological Engineering Co., Ltd. Tyrosine (Tyr) was purchased from Adamas-beta Reagent Co., Ltd. Arginine (Arg) was purchased from Sigma-Aldrich Corporation.

The composite was recorded with a GENESYS-150 UV-Vis absorption spectrometer. The aqueous solution of Zn-MOFs was characterized by a Lengguang F96pro fluorescence spectrophotometer under the conditions that the excitation wavelength was 355 nm and the measurement voltage was 650 V. The surface morphology and size of the Zn-MOFs were observed by QUANTA 450 environmental scanning electron microscopy (ESEM). The morphology of MnO<sub>2</sub> was observed using Tecnai G2 transmission electron microscopy (TEM). Powder XRD patterns were obtained using a MiniFlex600 powder X-ray diffractometer using Cu K<sub>α</sub> radiation ( $\lambda=1.540\text{\AA}$ ). Simultaneous thermogravimetric analysis (TGA) and thermogravimetry (Japan Rigaku Corporation) was used to determine Zn-MOFs. The zeta potential was measured on a ZetaLitesizer nanoparticle potentiometer. The fluorescence lifetime was collected using an Edinburgh FS5 spectrofluorometer. FTIR spectra were recorded on a Nicolet Avatar-330 spectrometer.

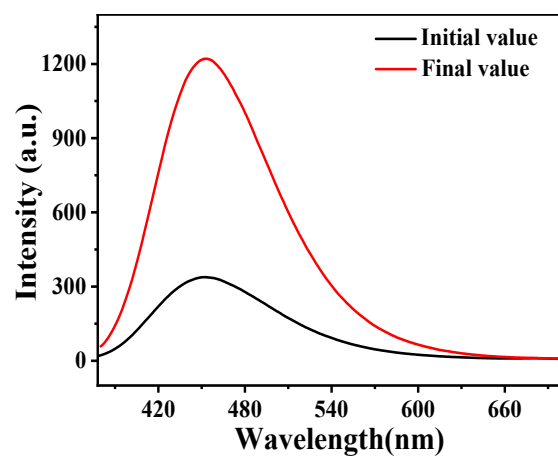

**Fig. S1.** The fluorescence intensity of Zn-MOF before and after optimizing the synthesis conditions

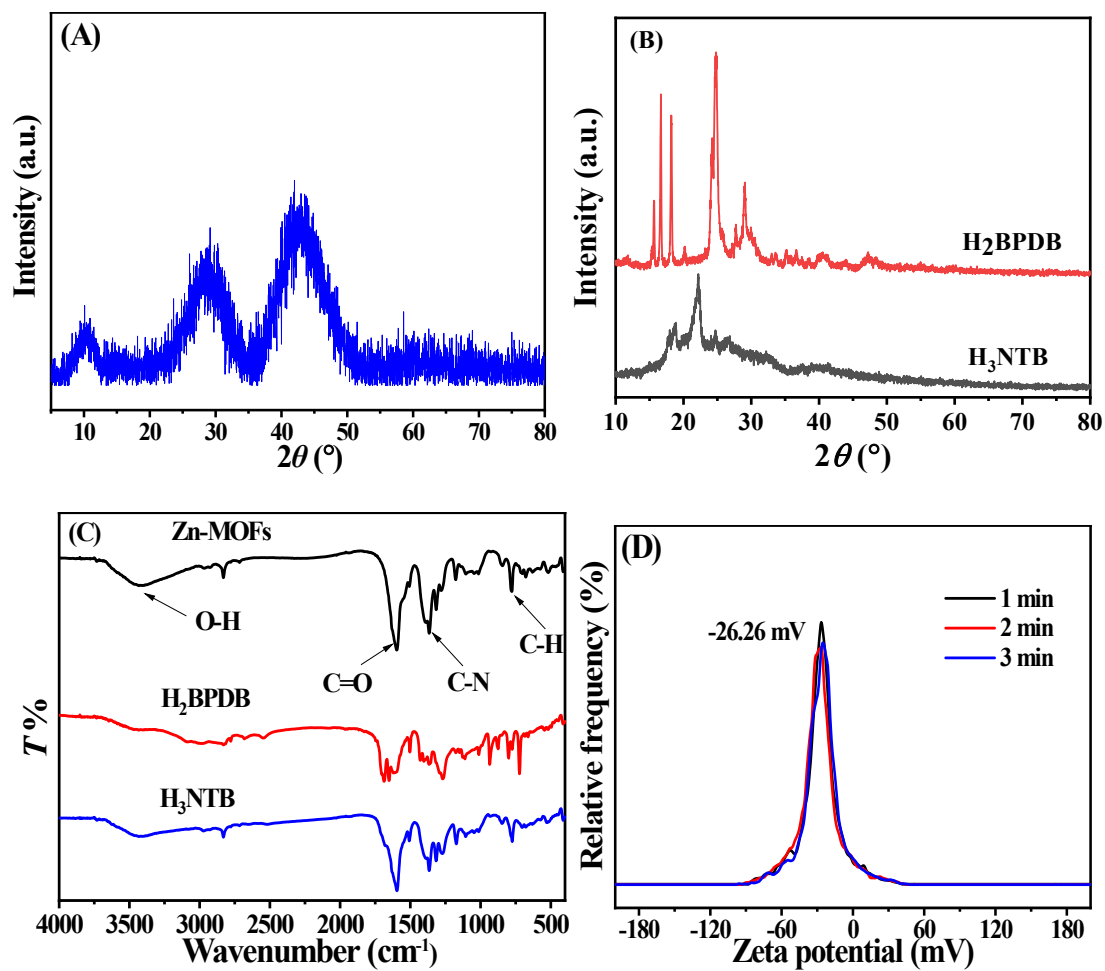

Fig. S2. XRD patterns of (A) Zn-MOFs and (B) the two ligands, (C) FTIR of different samples, (D) zeta potential of Zn-MOFs

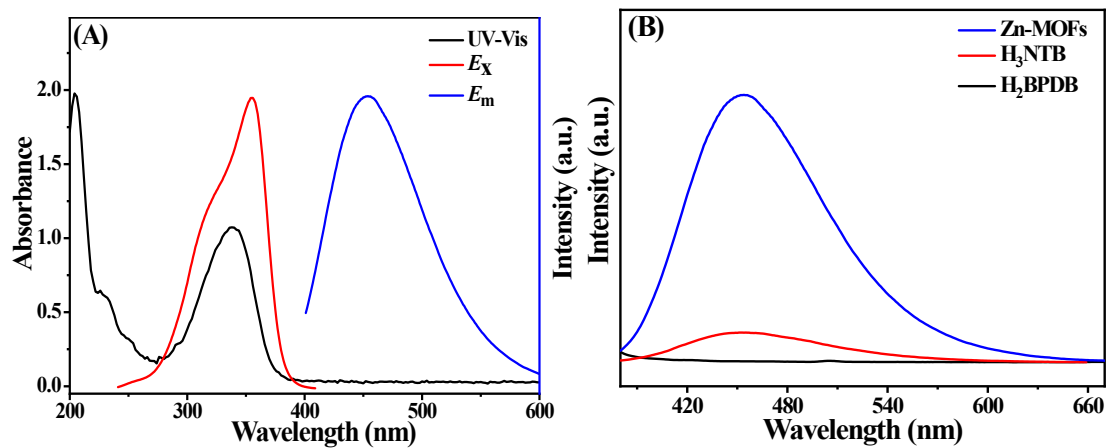

**Fig. S3.** (A) UV-Vis absorption and fluorescence spectra of Zn-MOFs, (B) fluorescence of Zn-MOFs and organic ligands of Zn-MOFs aqueous solution

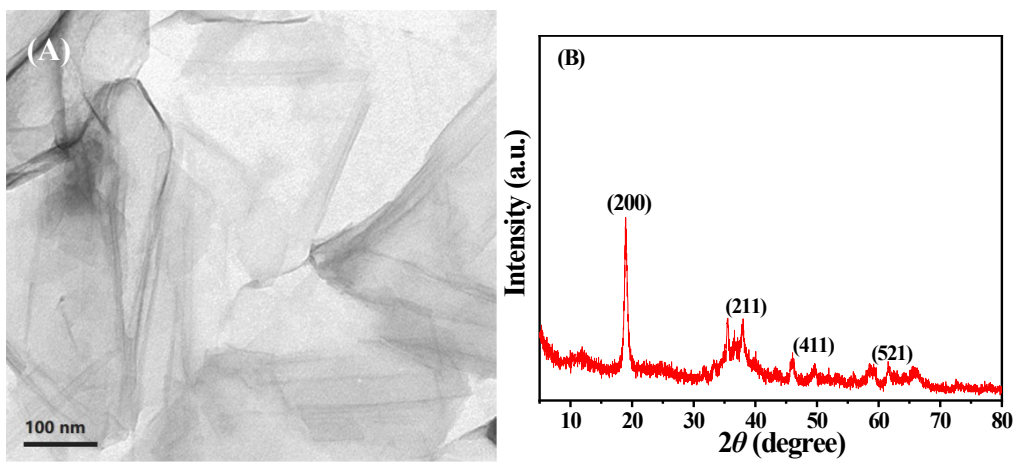

**Fig. S4.** (A) TEM image and (B) XRD pattern of MnO<sub>2</sub> NSs

**Table S1** Comparison of different GSH detection methods based on MnO<sub>2</sub> as an intermediate

| <b>Materials</b>     | <b>Detection method</b> | <b>Linear range</b>          | <b>LOD</b> | <b>Refs.</b> |
|----------------------|-------------------------|------------------------------|------------|--------------|
| BNQDs                | Fluorescence            | 0.50 $\mu$ M ~ 0.25 mM       | 160 nM     | 1            |
| COFs                 | Fluorescence            | 0.50 $\mu$ M ~ 0.10 mM       | 280 nM     | 2            |
| WS <sub>2</sub> QDs  | Fluorescence            | 0.00 $\mu$ M ~ 0.06 mM       | 120 nM     | 3            |
| de-CDs               | Fluorescence            | 1.00 $\mu$ M ~ 10.00 mM      | 600 nM     | 4            |
| Au                   | Fluorescence            | 0.50 $\mu$ M ~ 0.03 mM       | 100 nM     | 5            |
| MnO <sub>2</sub> /PS | Colorimetry             | 1.00 $\mu$ M ~ 0.05 mM       | 80 nM      | 6            |
| Ag                   | Colorimetry             | 0.10 $\mu$ M ~ 55.00 $\mu$ M | 80 nM      | 7            |
| Zn-MOFs              | Fluorescence            | 0.00 $\mu$ M ~ 0.16 mM       | 67 nM      | This work    |

## References

1. C. Peng, H. H. Xing, X. S. Fan, Y. Xue, J. Li, E. K. Wang, *Anal. Chem.*, 2019, 91, 5762-5767.
2. F. Qu, H. Yan, K. X. Li, J. M. You, W. L. Han, *J. Mater. Sci.*, 2020, 55, 10022-10034.
3. F. Y. Yan, Z. H. Sun, J. X. Xu, H. J. Li, Y. Y. Zhang, *Microchim. Acta*, 2020, 187, 344.
4. Z. W. Deng, X. F. Li, H. Liu, H. Yao, J. Zhang, J. Yuan, P. R. Gao, X. L. Jiang, Y. J. Yang, S. A. Zhong, *Microchim. Acta*, 2020, 187, 537.
5. C. Y. Wang, Y. Gao, S. Hu, A. Zhu, Y. Ying, X. Y. Guo, Y. P. Wu, Y. Wen, H. F. Yang, *Biosens. Bioelectron.*, 2022, 215, 114388.
6. Y. Liu, J. H. Yan, Z. H. Sun, Y. Huang, X. W. Li, Y. R. Jin, *Microchim. Acta*, 2022, 189, 63.
7. L. Tian, Z. J. Huang, W. D. Na, Y. Y. Liu, S. Wang, Y. He, W. J. Cheng, T. Z. Huang, Z. Li, T. X. Li, *Nanoscale*, 2022, 14, 15340-15347.
